# Supplementary material for: KH 2 PO 4 -based PK/UiO-66 nanoparticles for efficient nutrient delivery and plant growth promotion of pea seedlings
Source: Royal Society of Chemistry journal article supplement (doi:10.1039/d5en00170f), 2025-01-01
Supplement: d5en00170f1.pdf [file d5en00170f1.pdf]

## Electronic supplementary information

### Supplementary protocols

#### Text S1

**Materials.** Potassium dihydrogen phosphate ( $\text{KH}_2\text{PO}_4$ , 99.5%), methanol ( $\text{CH}_3\text{OH}$ , 99.5%), Tween 20 ( $\geq 40.0\%$ ), ammonium molybdate tetrahydrate ( $(\text{NH}_4)_6\text{Mo}_7\text{O}_{24} \cdot 4\text{H}_2\text{O}$ ,  $>99\%$ ), zirconium tetrachloride ( $\text{ZrCl}_4$ , 98%) and ammonium metavanadate ( $\text{NH}_4\text{VO}_3$ , 99%) were purchased from RHAWN Reagents, Inc Shanghai, China. N, N-dimethylformamide (DMF,  $\text{C}_3\text{H}_7\text{NO}$ , 99.5%) and nitric acid ( $\text{HNO}_3$ , 98%,) were purchased from Aladdin reagent company (Shanghai, China). Others were purchased from Cologne Chemicals Deionized (Chengdu, China). DI water ( $< 18.2 \text{ M}\Omega \cdot \text{cm}$ ) was used throughout the experiments.

#### Text S2

**Characterizations.** Characterization scanning electron microscopy (SEM, JSM-7500, JEOL, Japan), Raman spectroscopy (Raman, in Via, Renishaw Co., UK), Infrared spectroscopy (IR, Cary-600, Agilent, China), and X-ray diffraction (XRD, XD-6, General Instrumentation, Pukeno, China) were used to characterization of UiO-66 and PK/UiO-66. Energy dispersive spectroscopy (EDS, OXFORD Ultim Extreme, UK) was used to analyze the elemental distribution of the nanoparticles as well as the blades. Zeta potentials of all nanoparticles were obtained by dynamic scatterometry (Zetasizer Lab, Malvern Manalytical, UK).

## Supplementary tables

**Table S1.** Particle size of different samples and PDI (n=3)

| Sample    | Average size / nm  | PDI               |
|-----------|--------------------|-------------------|
| UiO-66    | $72.86 \pm 7.36$   | $0.343 \pm 0.057$ |
| PK/UiO-66 | $108.32 \pm 12.47$ | $0.447 \pm 0.083$ |

**Table S2.** The formulas and terms used in chlorophyll fluorescence determination.

| Glossary of terms for O-J-I-P (PS II)                   |                                           |
|---------------------------------------------------------|-------------------------------------------|
| PS II                                                   | Photosystem II                            |
| $Q_A$                                                   | Primary quinone acceptor of PS II         |
| $Q_B$                                                   | Secondary quinone acceptor of PS II       |
| $RC$                                                    | PS II reaction center                     |
| $CS$                                                    | Excited cross section                     |
| $ABS$                                                   | Absorption of solar flux                  |
| $TR$                                                    | Trapped energy flux                       |
| $ET$                                                    | Electron transport flux                   |
| $DI$                                                    | Dissipated energy flux                    |
| $PI$                                                    | Performance indexes                       |
| Fluorescence parameters derived from the extracted data |                                           |
| $F_v \equiv F_t - F_0$                                  | Variable fluorescence at time t           |
| $F_m \equiv F_M - F_0$                                  | Maximal variable fluorescence             |
| Specific energy fluxes                                  |                                           |
| $ABS/RC = M_0(1/V_j)(1/\varphi_{P0})$                   | Absorption flux per RC                    |
| $TR_0/RC = M_0(1/V_j)$                                  | Trapped energy flux per RC (at t = 0)     |
| $ET_0/RC = M_0(1/V_j)\Psi_0$                            | Electron transport flux per RC (at t = 0) |
| $DI_0/RC = ABS/RC - TR_0/RC$                            | Dissipated energy flux per RC (at t = 0)  |
| Yields or flux ratios                                   |                                           |

---

|                                                        |                                                                                                                       |
|--------------------------------------------------------|-----------------------------------------------------------------------------------------------------------------------|
| $\varphi_{Po} = TR_0 / ABS = [1 - (F_0 / F_M)]$        | Maximum quantum yield of primary<br>photochemistry (at $t = 0$ )                                                      |
| $\Psi_0 = ET_0 / TR_0 = (1 - V_j)$                     | Probability (at $t = 0$ ) that a trapped<br>exciton moves an electron into the<br>electron transport chain beyond QA- |
| $\varphi_{E0} = ET_0 / ABS = [1 - (F_0 / F_M)] \Psi_0$ | Quantum yield of electron transport (at $t = 0$ )                                                                     |
| $\varphi_{D0} = 1 - \varphi_{Po} = F_0 / F_M$          | Quantum yield of energy dissipation (at<br>$t = 0$ )                                                                  |

---

When  $t = t_{Fm}$ ,  $CS$  was replaced by  $CSm$ .

Adapted from Strasser et al. (2004):

Strasser, R.J.; Tsimilli-Michael, M.; Srivastava, A. Analysis of the Chlorophyll a Fluorescence Transient. In: Papageorgiou, G.C., Govindjee (eds) Chlorophyll a Fluorescence. *Advances in Photosynthesis and Respiration*, 2004, 19, Springer, Dordrecht, DOI: 10.1007/978-1-4020-3218-9\_12

**Table S3.** Normalized intensity ratios of UiO-66 peaks after PK coating.

| 2 $\theta$ Range (°) | Peak Ratio    | UiO-66 | PK/UiO-66 |
|----------------------|---------------|--------|-----------|
| 5-8                  | I7.3°/I5.3°   | 1.00   | 0.79      |
| 25-30                | I25.6°/I27.1° | 1.00   | 0.83      |
| 30-40                | I33.0°/I35.8° | 1.00   | 0.86      |

## Supplementary figures

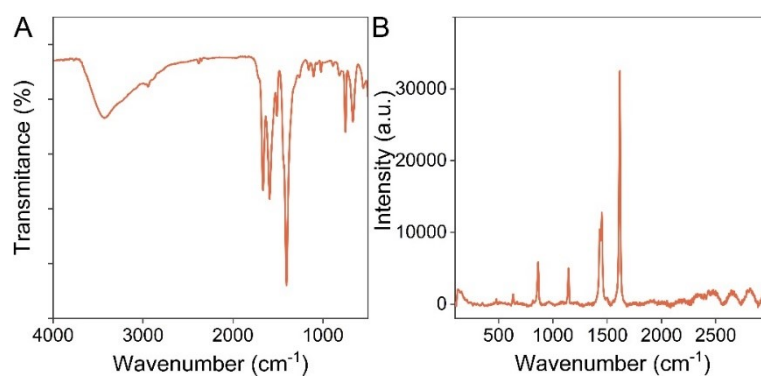

**Fig. S1.** IR (A) and Raman (B) spectrum of UiO-66.

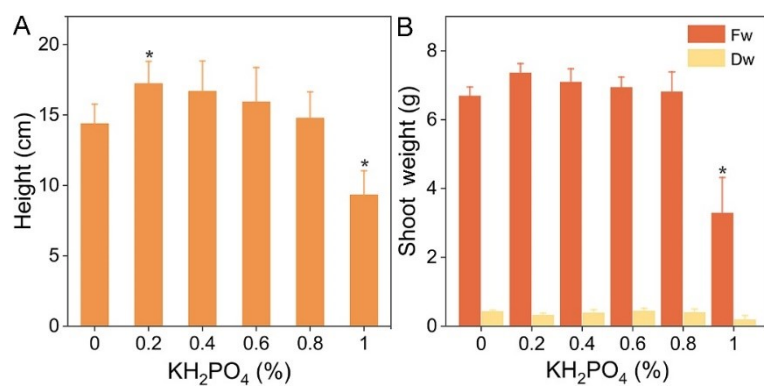

**Fig. S2.** Effects of different concentrations of  $\text{KH}_2\text{PO}_4$  on pea growth. (A) Stem length; (B) Shoot weight.

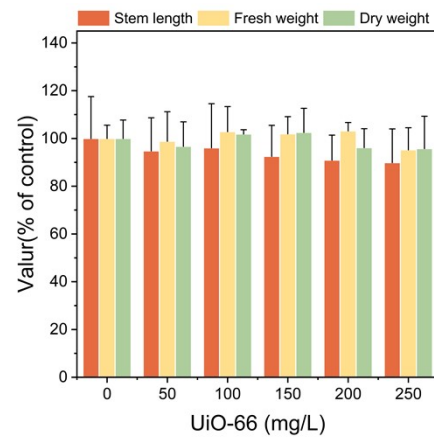

**Fig. S3.** Effect of UiO-66 spraying alone on pea growth.



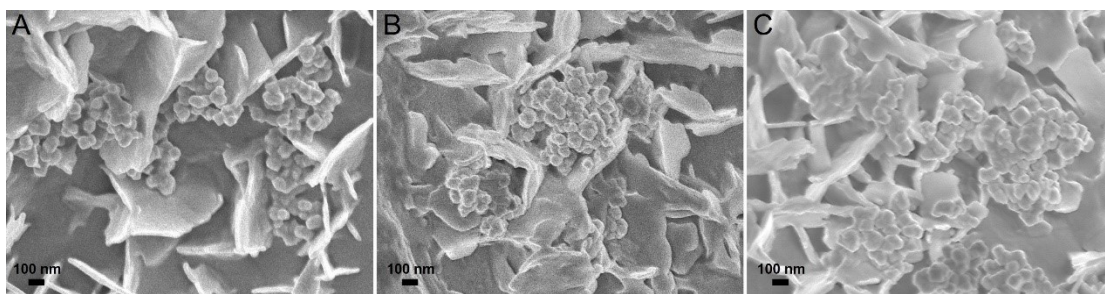

**Fig. S4.** Enlarged SEM image of the distribution of PK/UiO-66 NPs on the leaf surface.

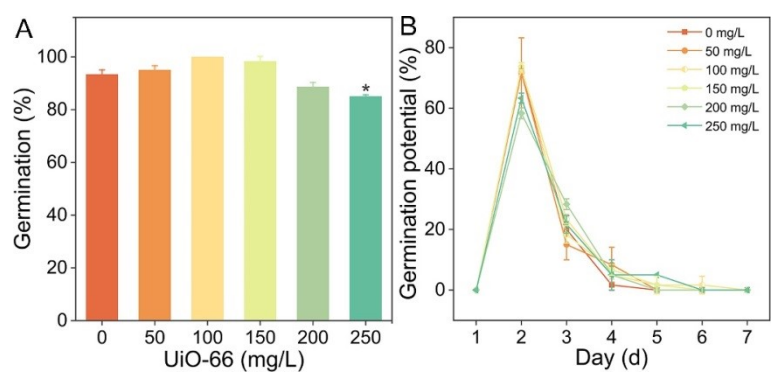

**Fig. S5.** Toxicity of UiO-66 to pea seeds. (A) Germination rate; (B) Germination potential.

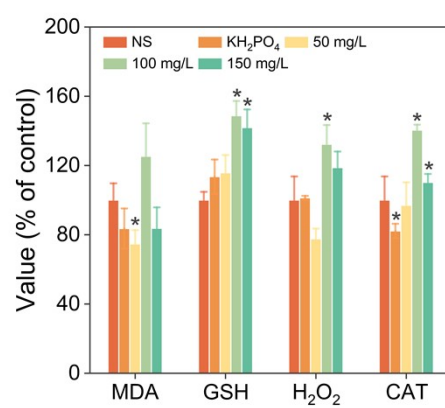

**Fig. S6.** Oxidative stress in pea leaves after foliar sprays.

**Data availability**

Data private access link: <https://www.scidb.cn/en/s/feAn2i>
